# Supplementary material for: Cannabinoid-mediated Modulation of Oxidative Stress and Early Inflammatory Response after Hypoxia–Ischemia
Source: PubMed Central journal article supplement (PMC7072925; doi:10.3390/ijms21041283), 2020-02-14

## Supplementary Material

Values of extent of HI and clinical variables of all groups including baseline (before the insult), HI (at the moment the insult was achieved), and from 0h (start of ventilation) until 3h after HI, obtained from [9]. Data are represented as mean ( $\pm$ SEM). Variables: pH (A),  $\text{paCO}_2$  (mm Hg, B),  $\text{paO}_2$  (mm Hg, C), MBP (mean blood pressure, mm Hg, D), base excess (meq/L, E), HR (heart rate, beats per minute, F). Sham: sham operated lambs (n=6); HI+VEH: asphyxiated lambs treated with vehicle (n=6); HI+WLN: asphyxiated lambs treated with WIN 0.01  $\mu\text{g}/\text{kg}$  i.v. immediately after HI (n=6). \* ANOVA,  $p < 0.05$  vs SHAM.

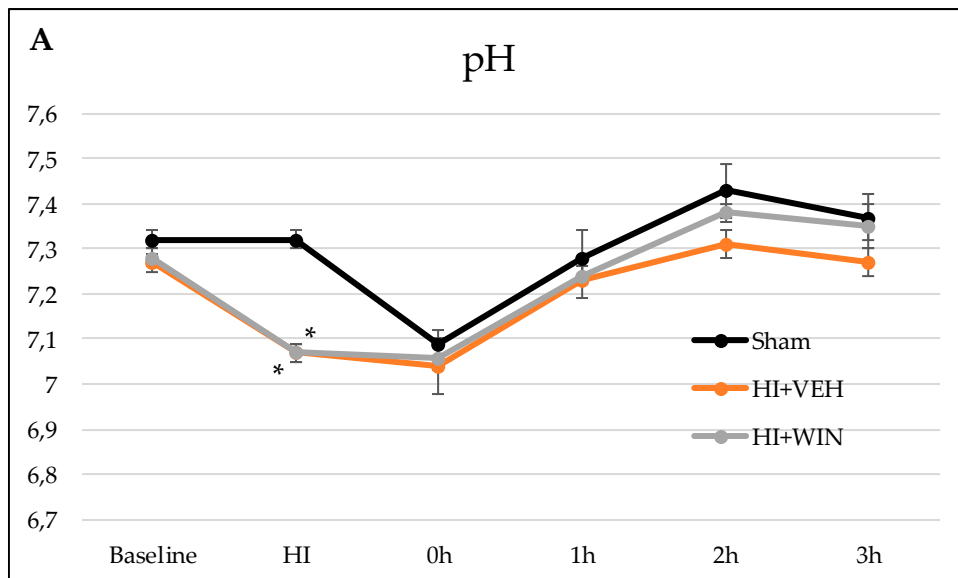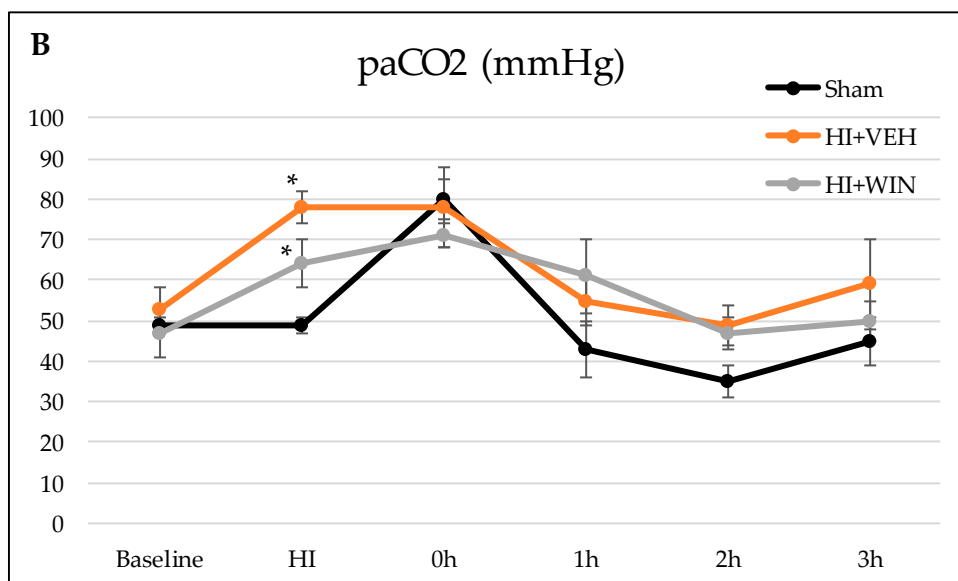

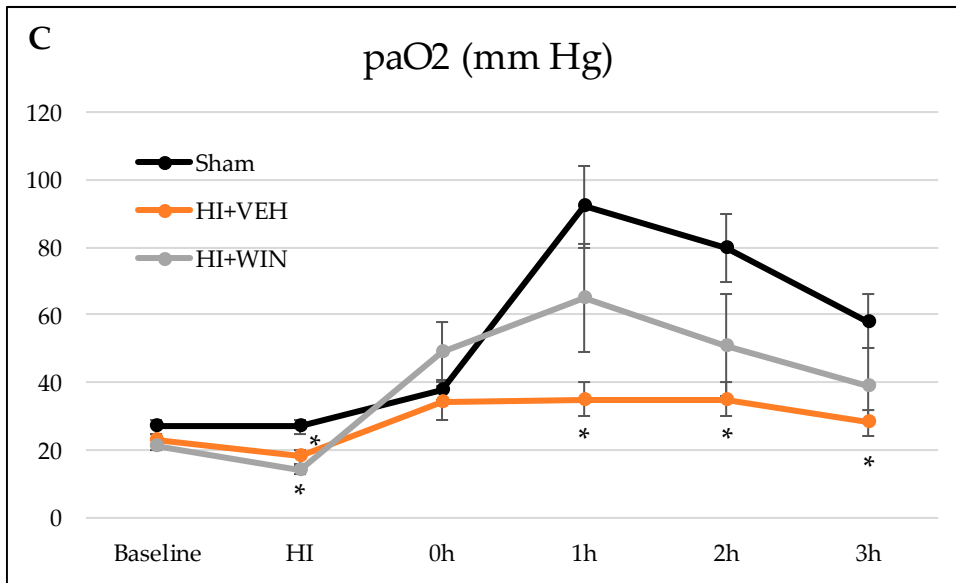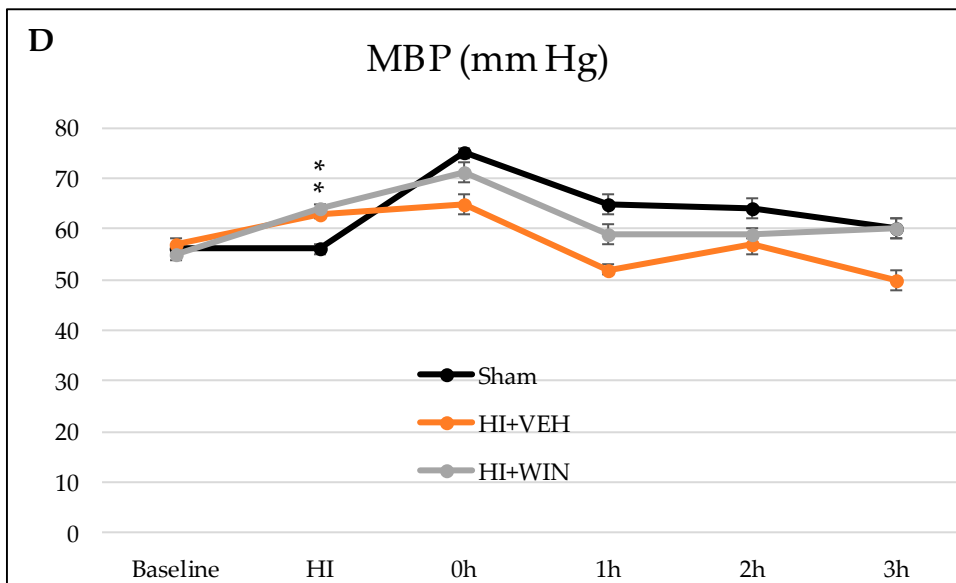

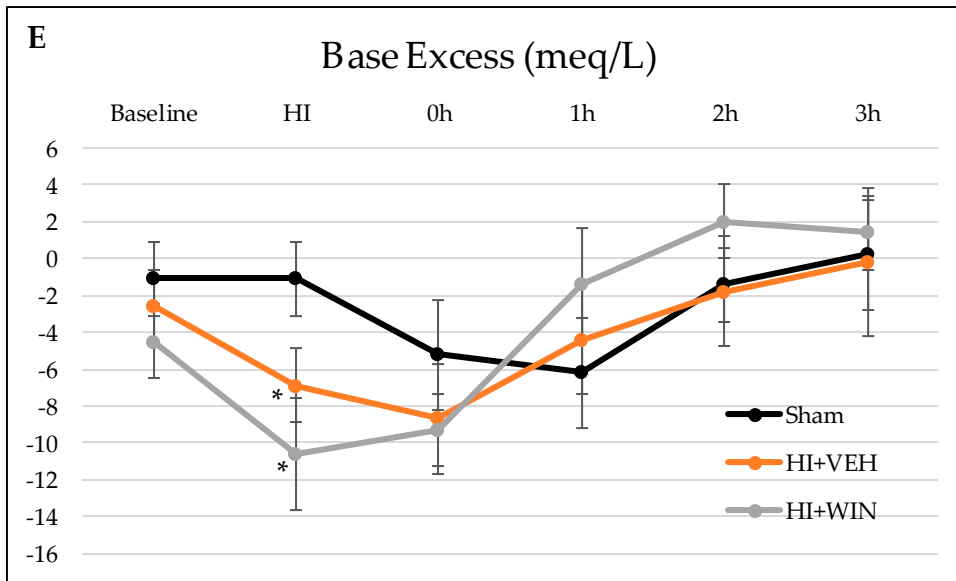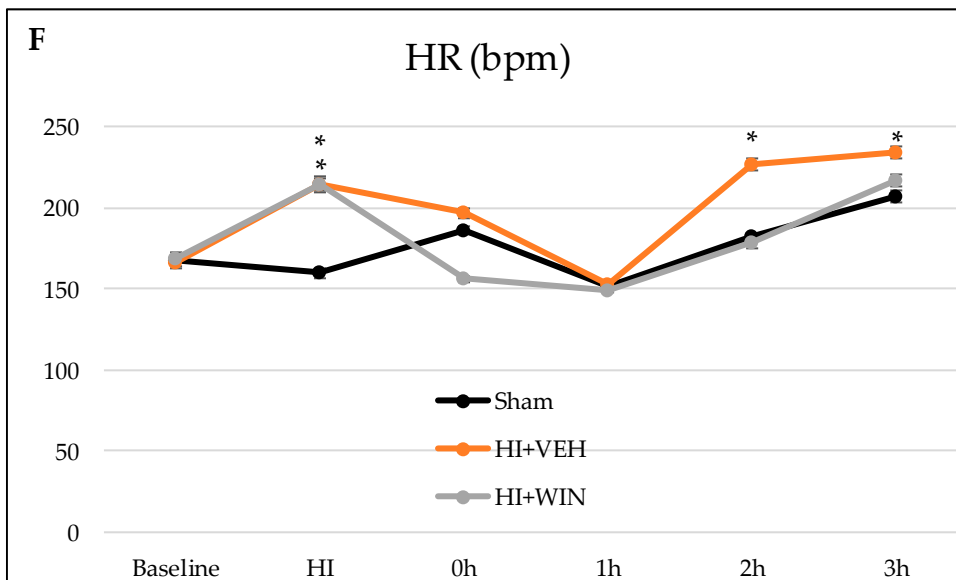

Supplement: ijms-21-01283-s001.pdf [file ijms-21-01283-s001.pdf]
